# Supplementary material for: Impact of delivery time factor on treatment time and plan quality in tomotherapy
Source: Research Square preprint supplement (doi:10.21203/rs.3.rs-2694774/v1), 2023-03-20
Supplement: Supplementary file 1 [file 1f69e999f6a10aa1ce8ad591.docx]

Table 3. Evaluation indices (means and standard deviations) for treatment plans with a DTF from 1.0 to 3.0
