# Supplementary material for: Impact of delivery time factor on treatment time and plan quality in tomotherapy
Source: Research Square preprint supplement (doi:10.21203/rs.3.rs-2694774/v1), 2023-03-20
Supplement: Supplementary file 2 [file 4ba761f249bfaffccd050566.docx]

Table 1. Patient characteristics
