# Supplementary material for: Impact of delivery time factor on treatment time and plan quality in tomotherapy
Source: Research Square preprint supplement (doi:10.21203/rs.3.rs-2694774/v1), 2023-03-20
Supplement: Supplementary file 3 [file 66756c1e0db4a4e4f900c7d1.docx]

Table 4. Rate of change (Δ) and the accumulation (Accum) of evaluation indices on the fitted curves with changes in DTF
