# Supplementary material for: Impact of delivery time factor on treatment time and plan quality in tomotherapy
Source: Research Square preprint supplement (doi:10.21203/rs.3.rs-2694774/v1), 2023-03-20
Supplement: Supplementary file 4 [file 73d2887d31dd3c270052ed18.docx]

Table 2. Optimization constraints for treatment planning
